# Supplementary material
Source: ML conference proceedings conference paper supplement (https://openreview.net/forum?id=U9zcbQVDGa)
Supplement: supplementary_material [file Real-World-experiments-by-sheet.xlsx]

## Sheet: gemini
Object	Palm Up						Palm Down
	z		y		x		z		y		x
	Rot	TTT	Rot	TTT	Rot	TTT	Rot	TTT	Rot	TTT	Rot	TTT
Apple	3	30	2.5	30	1.5	23	1.25	20	0.4	30	1.5	25
Box	1.5	30	1.15	30	0.9	30	0.3	18	0.3	30	0.3	30
Cream	0.75	18	0.75	14	1	13	1	15	0.2	30	0.75	11
Dolphin	0.75	21	1.75	30	1	10	0.75	11	1.6	30	1	16
Lemon	3	30	3.25	30	2.25	21	1	15	1.5	30	2.5	30
Mints	1.5	20	0.6	23	0.25	14	0.8	11	0.1	30	0.25	6
Orange	3.25	30	2.5	30	2.25	30	2	30	0.25	30	2.25	30
Peach	2.8	30	3.2	30	3.25	30	2.5	30	1.2	30	2.5	30
Pepper	2.6	30	1.5	30	1.75	30	1.75	30	0.3	30	1.75	30
Rubber-Duck	2	30	0.25	15	0.5	13	0.5	10	0.25	5	0.3	7
Average	2.115	26.9	1	26.2	1.465	21.4	1.185	19	0.61	27.5	1.31	21.5
	Rot	TTT
Overall Avg	1.28083	23.75

## Sheet: human-engineered baseline
	Palm up						Palm Down
	z		y		x		z		y		x
Object	Rots	TTT	Rots	TTT	Rots	TTT	Rots	TTT	Rots	TTT	Rots	TTT
Apple	2.15	30	1.5	30	1.85	30	0.25	9	0.25	30	1.75	30
Box	1.1	30	0.3	23	1.6	30	0.6	30	0.45	30	0.3	17
Cream	0.5	4	0.75	11	1.75	22	0.75	15	0.1	15	0.75	15
Dolphin	0.5	6	0.25	8	0.6	15	0.25	5	0.9	23	0.2	3
Lemon	0.5	5	1.25	28	0.75	9	0.25	4	1.25	27	0.2	4
Mints	0.5	21	0.5	22	1.5	19	0.2	3	0.1	29	0.25	7
Orange	2.5	30	1.5	27	2.25	30	0.2	3	0.9	29	2	30
Peach	2.25	27	2.75	30	1.75	27	2.25	30	1.75	30	2.1	30
Pepper	2	30	1.1	30	1.85	30	1.5	30	0.75	23	1.85	30
Rubber-Duck	0.25	7	0.5	25	0.25	9	0.25	12	0.2	4	0.2	6
Average	1.415	22.1	1	23.4	1.225	19	0.96	17.2	0.665	24	0.65	14.1
	Rot	TTT
Overall Avg	0.985833	19.9667

## Sheet: gpt-4o
Object	Palm Up						Palm Down
	z		y		x		z		y		x
	Rot	TTT	Rot	TTT	Rot	TTT	Rot	TTT	Rot	TTT	Rot	TTT
Apple	3.5	30	2.5	30	1.3	30	2.5	30	1.8	30	0.25	30
Box	1.4	28	0.4	21	0.5	16	0.8	30	0.1	30	0.5	17
Cream	1	16	1.25	30	0.75	8	2	27	0.25	16	0.2	2
Dolphin	2.8	30	1.75	30	1	11	0.45	10	0.6	10	0.4	4
Lemon	2	21	2.55	30	0.1	3	1.25	15	0.25	12	0.2	2
Mints	2	20	0.25	10	0.35	7	0.9	16	0.1	5	0.2	7
Orange	4	30	2.35	30	1.25	16	2.5	30	0.25	3	2	30
Peach	2.8	30	2.25	30	1.25	16	2.8	30	0.75	30	1.75	30
Pepper	2.85	30	1.25	30	2.15	30	2.8	30	0.3	30	1.5	30
Rubber-Duck	1	30	0.6	30	0.5	12	0.7	13	0.2	3	0.25	4
Average	2.335	26.5	1	27.1	0.915	14.9	1.67	23.1	0.46	16.9	0.725	15.6
	Rot	TTT
Overall Avg	1.18417	20.6833

## Sheet: deepseek
Object	Palm Up						Palm Down
	z		y		x		z		y		x
	Rot	TTT	Rot	TTT	Rot	TTT	Rot	TTT	Rot	TTT	Rot	TTT
Apple	3.3	30	1.6	30	1.75	28	2.2	30	0.75	30	1.5	30
Box	2	30	0.3	30	0.5	30	0.5	26	0.2	30	0.2	30
Cream	2.2	30	0.75	8	0.25	3	2.2	30	1.3	30	0.75	12
Dolphin	2	30	1.2	11	0.75	18	1.2	30	1.5	30	1	22
Lemon	3.25	30	2.5	30	0.25	4	2.25	30	2.1	30	0.1	3
Mints	0.5	6	0.25	14	0.3	30	1.4	19	0.15	30	0.25	12
Orange	3.25	30	2.3	30	1.5	30	2.25	30	1	30	2	30
Peach	3.5	30	1.75	19	1.25	13	2.7	30	2.25	30	2.25	30
Pepper	3.25	30	1.45	30	2.45	30	2.5	30	1.25	30	0.75	29
Rubber-Duck	1.25	30	0.5	29	0.7	30	0.6	22	0.3	30	0.4	6
Average	2.45	27.6	1	23.1	0.97	21.6	1.78	27.7	1.08	30	0.92	20.4
	Rot	TTT
Overall Avg	1.36667	25.0667
